# Supplementary material for: Dissecting endometrial cancer complexity in response to standard and targeted therapies
Source: Research Square preprint supplement (doi:10.21203/rs.3.rs-7240722/v1), 2025-09-01
Supplement: Supplementary file 1 [file 31159883c87f5923f3eea0ed.xlsx]

## Sheet: S1
Supplementary Table S1. Clinical features of enrolled patients
	Pt#1	Pt#2	Pt#3	Pt#4	Pt#5	Pt#6	Pt#7	Pt#8	Pt#9	Pt#10	Pt#11	Pt#12	Pt#13
Age	61	66	61	85	59	47	82	60	62	61	63	59	62
Date of surgery	2022-10-26	2022-11-07	2022-11-07	2022-11-08	2022-11-08	2022-11-14	2022-11-21	2022-12-13	2023-01-16	2023-02-13	2023-04-18	2024-02-14	2024-05-22
Stage FIGO 2009	IB	II	IB	IA	IA	II	IB	IB	IIIC1	IB	IA	IA2
Stage FIGO 2023	IB	IIA	IIC	IA2	IA2	IIA	IB	IB	IIIC1	IB	IA2	IA
Grade	2	3	3	2	2	2	3	3	3	2	2	2	3
Myometrial Infiltration	2	2	2	1	1	1	2	1	1	2	1	1	1
Cervical Stromal invasion	0	1	0	0	0	1	1	0	1	0	0	0	1
Histology	1	4	1	1	1	1	2	1	3	1	1	1	1
Surgical approach	2	2	2	2	2	2	2	2	2	2	2	2	2
POLE mutate	0	0	0	n/a	0	0	0	0	/	0	0	0	0
MLH1	0	2	0	1	1	0	2	2	/	1	1	x	0
MSH2	0	2	0	0	0	0	2	2	/	0	1	x	0
MSH6	0	2	0	0	0	0	2	2	/	0	1	x	0
MSH6/PMS2	0	2	0	1	1	0	2	2	/	1	1	x	0
TP53	0	0	0	0	0	0	0	yes	yes	0	0	x	0

## Sheet: S2
Supplementary Table S2. PDOs biobank features
PDOs samples	PX	Culture's Time	WES	RNA-SEQ	IHC	Treatment
EC_1T	Px3 - Px5	± 2 months	x	x	n.a.	x
EC_2T	Px3 - Px5	± 1 month	x	x	n.a.	x
EC_3T	Px5	± 1 month	n.a.	n.a.	n.a.	x
EC_4T	Px3 - Px5	± 2 months	x	x	1	x
EC_5T	Px3 - Px5	± 2 months	x	x	n.a.	x
EC_6T	Px3 - Px5	± 2 months	x	x	1	x
EC_7T	Px3 - Px5	± 3 month	x	x	1	x
EC_8T	Px3 - Px5	± 2 months	x	x	1	x
EC_9T	Px3 - Px5	± 2 months	x	x	n.a.	x
EC_10T	Px3 - Px5	± 3 month	x	x	1	x
EC_11T	Px3	± 1 month	x	x	n.a.	n.a.
EC_12T	Px3	± 1 month	x	x	1	n.a.
EC_13T	Px3	± 2 months	x	x	n.a.	n.a.

## Sheet: S3
Supplementary Table S3. VAF and mutated residues in matched-tissue and PDO
row.names	01_matched-tissue	01_PDO	02_matched-tissue	02_PDO	04_matched-tissue	04_PDO	05_matched-tissue	05_PDO	06_matched-tissue	06_PDO	07_matched-tissue	07_PDO	08_matched-tissue	08_PDO	09_matched-tissue	09_PDO	10_matched-tissue	10_PDO	11_matched-tissue	11_PDO
ANKRD11	0	0	0	0	0	0	0	0	0	0	0	0	0	0	0	0	0	21.7 (p.Thr157AsnfsTer4)	0	0
APC	0	0	0	0	0	0	0	0	0	0	0	0	0	0	0	0	0	7.6 (p.His791Tyr)	0	0
ARID1A	42.3 (p.Asn2131LysfsTer19)	40.8 (p.Trp1073Ter)	48.2 (p.Asn1784MetfsTer5)	8.2 (p.Asn1784MetfsTer5)	6.2 (p.Gln564HisfsTer55)	11.3 (p.Gln564HisfsTer55)	76.3 (p.Arg1335Ter)	63.1 (p.Arg1335Ter)	0	0	0	0	0	0	0	0	43.5 (p.Gln515Ter)	49 (p.Gln515Ter)	46.7 (p.Ser964ArgfsTer7)	38.7 (p.Ser964ArgfsTer7)
ARID1B	0	0	0	0	0	0	0	0	0	0	0	0	0	0	0	0	0	24.3 (p.Val2005TrpfsTer16)	0	0
ARID5B	0	0	0	0	44.6 (p.Glu456LysfsTer23)	19.6 (p.Glu456LysfsTer23)	0	0	0	0	0	0	0	0	0	0	0	0	0	0
ATM	0	0	0	0	0	0	0	0	0	0	0	0	0	0	0	0	0	9.3 (p.Pro2842Leu)	0	0
BCOR	0	0	0	0	0	0	0	0	0	0	0	0	10.3 (p.Asn1459Ser)	0	0	0	0	0	47.8 (p.Asn1459Ser)	35.3 (p.Asn1459Ser)
CASP8	0	0	0	0	0	0	0	0	0	14.7 (p.Val534Gly)	0	0	0	0	0	0	0	0	0	0
CCND1	0	0	0	0	0	0	39.8 (p.Thr286Ala)	42.9 (p.Thr286Ala)	35.4 (p.Arg291_Val293del)	18.1 (p.Arg291_Val293del)	0	0	0	0	0	0	38.8 (p.Thr286Ala)	47 (p.Thr286Ala)	0	0
CHD4	47.6 (p.Leu1124Phe)	34.1 (p.Leu1124Phe)	0	0	0	0	0	0	0	0	0	0	0	0	0	0	0	0	0	0
CTCF	38.3 (p.Arg377His)	31 (p.Arg377His)	0	0	37.9 (p.Gly335Ter)	25.8 (p.Gly335Ter)	36.5 (p.Cys356Ter)	35.5 (p.Cys356Ter)	41.3 (p.His441ProfsTer3)	15.6 (p.His441ProfsTer3)	0	0	0	0	0	0	38.6 (p.Arg544His)	20.2 (p.Arg544His)	0	0
CTNNB1	40 (p.Thr41Ala)	28.7 (p.Thr41Ala)	0	0	32.6 (p.Thr41Ile)	22.3 (p.Thr41Ile)	0	0	38.4 (p.Asp32Tyr)	23.3 (p.Asp32Tyr)	0	0	7.4 (p.Gly34Arg)	48.6 (p.Ser37Cys)	0	0	0	0	51.1 (p.Gly34Val)	41 (p.Gly34Val)
ERBB2	0	0	0	0	33.4 (p.Ser310Phe)	25.5 (p.Ser310Phe)	0	0	0	0	0	0	0	0	0	0	39 (p.Leu755Ser)	20 (p.Leu755Ser)	0	0
ERBB3	0	0	0	0	0	0	0	0	0	0	0	0	0	45.2 (p.Asp297Tyr)	0	0	42.3 (p.His1304ProfsTer12)	49.5 (p.His1304ProfsTer12)	0	0
ESR1	0	0	0	0	0	0	0	0	0	0	0	0	0	0	0	0	0	0	85.7 (p.Asp538Gly)	32.9 (p.Asp538Gly)
FAT1	0	0	0	0	0	0	0	0	0	0	0	0	0	0	0	0	0	11.3 (p.Arg3420Gly)	0	0
FBXW7	0	0	0	0	34.6 (p.Arg479Gln)	0	0	0	0	0	0	0	0	0	0	0	37.3 (p.His540IlefsTer16)	42.5 (p.His540IlefsTer16)	0	0
FGFR2	0	0	0	0	0	0	39.4 (p.Ser252Trp)	47.6 (p.Ser252Trp)	0	0	0	0	0	0	0	0	0	0	0	0
FOXA2	0	0	66.6 (p.Gln287Ter)	12.2 (p.Gln287Ter)	0	0	0	0	0	0	0	0	9.4 (p.Phe223Leu)	51.4 (p.Leu83ArgfsTer156)	40.5 (p.Ile213Phe)	43.8 (p.Phe201Leu)	0	0	0	0
JAK1	0	0	0	0	0	0	0	0	0	0	0	0	0	0	0	0	40.2 (p.Lys860AsnfsTer16)	12 (p.Gln180Ter)	0	0
KMT2B	0	0	0	0	32.2 (p.Glu2603Lys)	29.7 (p.Glu2603Lys)	0	0	0	0	0	0	0	0	0	0	38.2 (p.Gln1542Ter)	47.8 (p.Gln1542Ter)	0	0
KMT2C	0	0	0	0	0	0	0	33 (p.Lys2797ArgfsTer26)	0	0	0	0	7.4 (p.Ser2816TyrfsTer3)	0	0	0	0	22.7 (p.Asn2842LysfsTer2)	0	0
KMT2D	0	0	0	0	37.3 (p.Arg2915Ter)	22.4 (p.Arg2915Ter)	41.7 (p.Gly1235ValfsTer95)	0	0	0	0	0	0	0	0	0	34.3 (p.Gln2674Ter)	36.9 (p.Gln2674Ter)	0	0
KRAS	0	0	0	0	0	0	0	0	0	0	58.8 (p.Gly12Asp)	64.4 (p.Gly12Asp)	0	0	39.5 (p.Gly13Cys)	54.1 (p.Gly12Val)	0	0	0	0
MED12	0	0	0	0	0	0	0	0	0	7.1 (p.Asp1647Gly)	0	0	0	0	0	0	35.7 (p.Phe687Leu)	22.5 (p.Phe687Leu)	0	0
MSH3	0	0	0	0	0	0	0	0	0	0	0	0	0	0	0	0	0	0	0	0
MSH6	0	0	0	0	0	0	0	0	0	0	0	0	0	0	0	0	0	9.1 (p.Gly1072Asp)	0	0
NF1	0	0	0	0	0	0	0	0	0	8.1 (p.Ile386Thr)	0	0	0	0	0	0	0	0	0	0
NFE2L2	0	0	0	0	0	0	0	0	0	0	0	0	0	0	0	0	36.1 (p.Gln51ThrfsTer5)	47.5 (p.Gln51ThrfsTer5)	0	0
NSD1	0	0	0	0	0	0	0	0	0	0	0	0	0	0	0	0	6.8 (p.Met1531AsnfsTer4)	9.1 (p.Val950Ile)	0	0
PIK3CA	36.7 (p.Pro104_Val105delinsLeu)	24.5 (p.Pro104_Val105delinsLeu)	86.2 (p.His1047Arg)	43.3 (p.His1047Arg)	41.8 (p.Glu542Gln)	23.3 (p.Glu542Gln)	0	20.6 (p.Arg38His)	39.6 (p.Cys420Arg)	31.2 (p.Cys420Arg)	97.9 (p.Glu542Gln)	93 (p.Glu542Gln)	0	0	0	43.6 (p.Glu542Val)	35.5 (p.Arg88Gln)	53 (p.Arg88Gln)	38.2 (p.His1047Arg)	36.1 (p.His1047Arg)
POLD1	0	0	0	0	0	0	0	0	0	0	0	0	0	0	0	0	0	21.7 (p.Asp877Asn)	0	0
POLE	0	0	0	0	0	0	0	0	0	0	0	0	0	0	0	0	39.6 (p.Leu698CysfsTer94)	18.1 (p.Leu698CysfsTer94)	0	0
PPP2R1A	0	0	53.8 (p.Trp257Cys)	10.4 (p.Trp257Cys)	0	0	0	0	0	0	0	0	0	0	66.8 (p.Ala39Pro)	0	0	0	0	0
PTEN	79.2 (p.Tyr225Ter)	60.3 (p.Tyr225Ter)	0	0	78.8 (p.Glu314Ter)	46.7 (p.Glu314Ter)	90.1 (p.Tyr65Ter)	76.3 (p.Tyr65Ter)	63.3 (p.Lys289ThrfsTer3)	25.3 (p.Lys289ThrfsTer3)	0	0	9.7 (p.Leu146Ter)	0	0	0	0	17 (p.Asn323MetfsTer21)	0	0
RASA1	0	0	0	0	0	0	0	0	0	0	0	0	0	0	0	0	0	22.4 (p.Lys949=)	0	0
RRAS2	0	0	0	0	0	0	0	0	0	0	0	0	0	0	0	0	36.2 (p.Gly23Val)	41 (p.Gly23Val)	0	36.2 (p.Gly23Cys)
SOX17	0	0	0	0	0	0	0	32.8 (p.Glu264GlyfsTer101)	0	0	0	0	9.5 (p.Met42IlefsTer2)	0	0	0	40.5 (p.Ala96Gly)	49.1 (p.Ala96Gly)	0	0
SPOP	0	0	0	0	0	0	0	0	0	0	44.9 (p.Met117Thr)	50 (p.Met117Thr)	0	0	0	0	0	0	0	0
TP53	0	0	91.9 (p.Leu43Ter)	9.9 (p.Leu43Ter)	0	0	0	0	0	0	0	0	7.9 (p.His193Leu)	0	78.3 (p.Tyr236Asp)	0	0	0	0	0
ZFHX3	0	0	0	0	0	0	0	26 (p.Ala3407LeufsTer78)	0	0	0	0	0	0	0	46.3 (p.Gly3526_Gly3527del)	0	21.3 (p.Pro3439His)	0	0

## Sheet: S4
Supplementary Table S3. Mean and standard deviation of viability after chemotherapy treatment
	Viability (± SD)
Drugs	1T_PDO	2T_PDO	3T_PDO	4T_PDO	5T_PDO	6T_PDO	7T_PDO	8T_PDO	9T_PDO	10T.PDO
Carboplatin 100 µM	42,89 ± 19,96	35,56 ± 14,99	71,61 ± 6,17	77,76 ± 8,42	67,44 ± 17,88	69,87 ± 11,96	83,86 ± 1,7	51,36 ± 4,56	94,77 ± 13,73	67,42 ± 5,21
Carboplatin 200 µM	24,33 ± 13,21	n.a.	n.a.	n.a.	50,23 ± 17,66	33,63 ± 5,72	60,13 ± 0,22	n.a.	n.a.	56,14 ± 4,18
Paclitaxel 100 nM	91,29 ± 12,2	n.a.	n.a.	n.a.	90 ± 10,96	54,86 ± 8,33	64,55 ± 17,46	n.a.	n.a.	62,07 ±16,47
Paclitaxel 200 nM	66,19 ± 16,36	n.a.	n.a.	n.a.	100 ± 7,89	59,65 ± 5,66	100 ± 18,04	n.a.	n.a.	73,52 ± 5,88
Carbo 100 µM + Pac 100 nM	44,88 ± 0,99	45,16 ± 15,03	47,33 ± 10,81	53,87 ± 4,37	73 ± 8,72	48,12 ± 5,92	83,6 ± 5,72	58,70 ± 4,49	86,76 ± 16,34	50,16 ± 8,44
Carbo 100 µM + Pac 200 nM	18,45 ± 3,14	29,33 ± 12,58	48,41 ± 1,15	48,94 ± 4,84	54,65 ± 17,72	22,78 ± 5,47	73,44 ± 10,78	22,56 ± 7,05	75,73 ± 7,58	45,79 ± 6,80
Carbo 200 µM + Pac 100 nM	13,2 ± 6,26	n.a.	n.a.	n.a.	20,23 ± 8,18	15,16 ± 5,35	61,19 ± 13,47	n.a.	n.a.	29,79 ± 4,03
Carbo 200 µM + Pac 200 nM	33,84 ± 0,3	n.a.	n.a.	n.a.	36,51 ± 2,9	25,08 ± 0,69	59,79 ± 7,46	n.a.	n.a.	38,18 ± 10,08

## Sheet: S5
Supplementary Table S4. Number of PDOs after chemotherapy treatment
	number of PDOs
Drugs	6T_PDO	7T_PDO	10T_PDO
Vehicle	116	126	210
Carbo 100 µM + Pac 100 nM	86.67	147	106
Carbo 200 µM + Pac 200 nM	60	122.67	103

## Sheet: S6
Supplementary Table S6. Mean and standard deviation of viability after targeted therapy
		Viability (± SD)
Drugs	Dose	6T_PDO	7T_PDO	10T_PDO
Adagrasib	0.1 µM	n.a.	89,80 (± 10,31)	n.a.
	1 µM	n.a.	94,65 (± 7,34)	n.a.
	10 µM	n.a.	68,63 (± 19,29)	n.a.
Alpelisib	0.1 µM	71,1 (± 36,45)	95,37 (± 8,06)	66,76 (± 4,70)
	1 µM	67, (± 30,07)	74,69 (± 11,72)	47,01 (± 6,39)
	10 µM	9,27 (± 9,53)	44,63 (± 13,23)	21,83 (± 2,53)
Buparlisib	0.1 µM	n.a.	94,26 (± 8,97)	n.a.
	1 µM	n.a.	62,80 (± 7,89)	n.a.
	10 µM	n.a.	30,13 (± 5,77)	n.a.
Gedatolisib	0.1 µM	57,33 (± 23,12)	94,26 (± 8,97)	27,58 (± 8,79)
	1 µM	20,31 (± 18,77)	62,80 (± 7,89)	6,65 (± 0,75)
	10 µM	9,27 (± 9,53)	30,13 (± 5,77)	2,98 (± 0,58)
Ipatasertib	0.1 µM	n.a.	83,71 (± 11,44)	n.a.
	1 µM	n.a.	83,01 (± 5,09)	n.a.
	10 µM	n.a.	47,55 (± 16,94)	n.a.
Olaparib	0.1 µM	n.a.	n.a.	87,53 (± 10,91)
	1 µM	n.a.	n.a.	86,22 (± 19,64)
	10 µM	n.a.	n.a.	49,37 (± 14,43)
Rigosertib	0.1 µM	88,27 (± 32,38)	97,83 (± 6,41)	n.a.
	1 µM	61,30 (± 13,13)	69,21 (± 7,70)	n.a.
	10 µM	45,31 (± 12,19)	70,83 (± 7,12)	n.a.
Trastuzumab Deruxtecan	0.1 µM	n.a.	n.a.	99,64 (± 26,26)
	1 µM	n.a.	n.a.	91,29 (± 9,80)
	10 µM	n.a.	n.a.	48,91 (± 12,54)
Volasertib	0.1 µM	97,25 (± 11,5)	n.a.	n.a.
	1 µM	78,03 (± 29,37)	n.a.	n.a.
	10 µM	1,37 (± 1,39)	n.a.	n.a.

## Sheet: S7
Supplementary Table S7. VAF and mutated residues in matched-tissue, PDO and CAF
row.names	01_matched-tissue	01_PDO	01_CAF	03_matched-tissue	03_PDO	03_CAF	04_matched-tissue	04_PDO	04_CAF	05_matched-tissue	05_PDO	05_CAF	06_matched-tissue	06_PDO	06_CAF	10_matched-tissue	10_PDO	10_CAF
ANKRD11	0	0	0	0	0	0	0	0	0	0	0	0	0	0	0	0	21.7 (p.Thr157AsnfsTer4)	0
APC	0	0	0	0	0	0	0	0	0	0	0	0	0	0	0	0	7.6 (p.His791Tyr)	0
ARID1A	42.3 (p.Asn2131LysfsTer19)	40.8 (p.Trp1073Ter)	0	0	0	0	6.2 (p.Gln564HisfsTer55)	11.3 (p.Gln564HisfsTer55)	0	76.3 (p.Arg1335Ter)	63.1 (p.Arg1335Ter)	0	0	0	0	43.5 (p.Gln515Ter)	49 (p.Gln515Ter)	0
ARID1B	0	0	0	0	0	0	0	0	0	0	0	0	0	0	19.6 (p.Gly461Ala)	0	24.3 (p.Val2005TrpfsTer16)	0
ARID5B	0	0	0	0	0	0	44.6 (p.Glu456LysfsTer23)	19.6 (p.Glu456LysfsTer23)	0	0	0	0	0	0	0	0	0	0
ATM	0	0	0	0	0	0	0	0	0	0	0	0	0	0	0	0	9.3 (p.Pro2842Leu)	0
CASP8	0	0	5 (p.Asp99AlafsTer31)	0	0	0	0	0	0	0	0	0	0	14.7 (p.Val534Gly)	0	0	0	0
CCND1	0	0	0	0	0	0	0	0	0	39.8 (p.Thr286Ala)	42.9 (p.Thr286Ala)	0	35.4 (p.Arg291_Val293del)	18.1 (p.Arg291_Val293del)	0	38.8 (p.Thr286Ala)	47 (p.Thr286Ala)	0
CHD4	47.6 (p.Leu1124Phe)	34.1 (p.Leu1124Phe)	0	0	0	0	0	0	0	0	0	0	0	0	0	0	0	0
CTCF	38.3 (p.Arg377His)	31 (p.Arg377His)	0	0	0	0	37.9 (p.Gly335Ter)	25.8 (p.Gly335Ter)	0	36.5 (p.Cys356Ter)	35.5 (p.Cys356Ter)	0	41.3 (p.His441ProfsTer3)	15.6 (p.His441ProfsTer3)	0	38.6 (p.Arg544His)	20.2 (p.Arg544His)	0
CTNNB1	40 (p.Thr41Ala)	28.7 (p.Thr41Ala)	0	0	0	0	32.6 (p.Thr41Ile)	22.3 (p.Thr41Ile)	0	0	0	0	38.4 (p.Asp32Tyr)	23.3 (p.Asp32Tyr)	0	0	0	0
ERBB2	0	0	0	0	0	0	33.4 (p.Ser310Phe)	25.5 (p.Ser310Phe)	0	0	0	0	0	0	0	39 (p.Leu755Ser)	20 (p.Leu755Ser)	0
ERBB3	0	0	0	0	0	0	0	0	0	0	0	0	0	0	0	42.3 (p.His1304ProfsTer12)	49.5 (p.His1304ProfsTer12)	0
FAT1	0	0	0	0	0	0	0	0	0	0	0	0	0	0	0	0	11.3 (p.Arg3420Gly)	0
FBXW7	0	0	0	0	0	0	34.6 (p.Arg479Gln)	0	0	0	0	0	0	0	0	37.3 (p.His540IlefsTer16)	42.5 (p.His540IlefsTer16)	0
FGFR2	0	0	0	0	0	0	0	0	0	39.4 (p.Ser252Trp)	47.6 (p.Ser252Trp)	0	0	0	0	0	0	0
JAK1	0	0	0	0	0	0	0	0	0	0	0	0	0	0	0	40.2 (p.Lys860AsnfsTer16)	12 (p.Gln180Ter)	0
KMT2B	0	0	0	0	0	0	32.2 (p.Glu2603Lys)	29.7 (p.Glu2603Lys)	0	0	0	0	0	0	0	38.2 (p.Gln1542Ter)	47.8 (p.Gln1542Ter)	0
KMT2C	0	0	0	0	0	0	0	0	0	0	33 (p.Lys2797ArgfsTer26)	0	0	0	0	0	22.7 (p.Asn2842LysfsTer2)	0
KMT2D	0	0	0	0	0	0	37.3 (p.Arg2915Ter)	22.4 (p.Arg2915Ter)	0	41.7 (p.Gly1235ValfsTer95)	0	0	0	0	0	34.3 (p.Gln2674Ter)	36.9 (p.Gln2674Ter)	0
KRAS	0	0	0	95.9 (p.Gly12Val)	87.1 (p.Gly12Val)	0	0	0	0	0	0	0	0	0	0	0	0	0
MED12	0	0	0	0	0	0	0	0	0	0	0	0	0	7.1 (p.Asp1647Gly)	0	35.7 (p.Phe687Leu)	22.5 (p.Phe687Leu)	0
MSH3	0	0	0	0	0	0	0	0	0	0	0	0	0	0	0	0	0	0
MSH6	0	0	0	0	0	0	0	0	0	0	0	0	0	0	0	0	9.1 (p.Gly1072Asp)	0
NF1	0	0	0	0	0	0	0	0	0	0	0	0	0	8.1 (p.Ile386Thr)	8.4 (p.Ile386Thr)	0	0	0
NFE2L2	0	0	0	0	0	0	0	0	0	0	0	0	0	0	0	36.1 (p.Gln51ThrfsTer5)	47.5 (p.Gln51ThrfsTer5)	0
NSD1	0	0	0	0	0	0	0	0	0	0	0	0	0	0	0	6.8 (p.Met1531AsnfsTer4)	9.1 (p.Val950Ile)	0
PIK3CA	36.7 (p.Pro104_Val105delinsLeu)	24.5 (p.Pro104_Val105delinsLeu)	0	0	0	0	41.8 (p.Glu542Gln)	23.3 (p.Glu542Gln)	0	0	20.6 (p.Arg38His)	0	39.6 (p.Cys420Arg)	31.2 (p.Cys420Arg)	0	35.5 (p.Arg88Gln)	53 (p.Arg88Gln)	0
POLD1	0	0	0	0	0	0	0	0	0	0	0	0	0	0	0	0	21.7 (p.Asp877Asn)	0
POLE	0	0	0	0	0	0	0	0	0	0	0	0	0	0	0	39.6 (p.Leu698CysfsTer94)	18.1 (p.Leu698CysfsTer94)	0
PTEN	79.2 (p.Tyr225Ter)	60.3 (p.Tyr225Ter)	0	0	0	0	78.8 (p.Glu314Ter)	46.7 (p.Glu314Ter)	0	90.1 (p.Tyr65Ter)	76.3 (p.Tyr65Ter)	0	63.3 (p.Lys289ThrfsTer3)	25.3 (p.Lys289ThrfsTer3)	0	0	17 (p.Asn323MetfsTer21)	0
RASA1	0	0	0	0	0	0	0	0	0	0	0	0	0	0	0	0	22.4 (p.Lys949=)	0
RRAS2	0	0	0	0	0	0	0	0	0	0	0	0	0	0	0	36.2 (p.Gly23Val)	41 (p.Gly23Val)	0
SOX17	0	0	0	0	0	0	0	0	0	0	32.8 (p.Glu264GlyfsTer101)	0	0	0	0	40.5 (p.Ala96Gly)	49.1 (p.Ala96Gly)	0
TP53	0	0	0	0	0	0	0	0	0	0	0	0	0	0	0	0	0	0
ZFHX3	0	0	0	0	0	0	0	0	0	0	26 (p.Ala3407LeufsTer78)	0	0	0	0	0	21.3 (p.Pro3439His)	0
