# Supplementary material for: Dissecting endometrial cancer complexity in response to standard and targeted therapies
Source: Research Square preprint supplement (doi:10.21203/rs.3.rs-7240722/v1), 2025-09-01
Supplement: Supplementary file 2 [file d376318e7cb9b75a4550ef8d.docx]

**Supplementary Table 1. *Clinical features of enrolled patients.***

Grade (*1= grade 1; 2= grade 2; 3= grade 3*); myometrial infiltration (*1< 50%; 2>50%*); cervical stromal invasion (*0= no; 1= yes; 9= unknown*); histology (*1= endometroid;2= undifferentiated; 3= carcinosarcoma; 4= mixed (endometroid/serous)*); surgical approach (*1= minimally invasive (MIS); 2= MIS robotic; 3= open*); TP53 (*0< 50%*); MLH1, MSH2, MSH6, MSH6 + PMS2 (*0= stable; 1= high instability; 2= low instability*); POLE mut (*0= no; 1= yes; 2= VUS*).

**Supplementary Table 2. *PDOs biobank features.***

The table reports the main analyses performed on each PDO, including histological assessment, molecular profiling and standard treatment testing. For each PDOs line, the table also shows the total culture time (in months) and number of passages achieved. PDOs passages (Px), Whole Exome Sequencing (WES), RNA sequencing (RNA-seq), Immunohistochemistry (IHC), not available (n.a.).

**Supplementary Table 3. *VAF and mutated residues in matched-tissue and PDO.***

**Supplementary Table 4. *Mean and standard deviation of viability after chemotherapy treatment.***

Mean percentage and standard deviation of cell viability for 6T, 7T, and 10T PDOs after 72 hours of standard treatment assessed by ATP luminescence assay.

**Supplementary Table 5. *Number of PDOs after chemotherapy treatment.***

Mean of number of PDOs for 6T, 7T, and 10T PDOs after 72 hours of standard treatment evaluated using the Opera Phenix’s machine learning.

**Supplementary Table 6. *Mean and standard deviation of viability after targeted therapy.***

Mean percentage and standard deviation of cell viability for 6T, 7T, and 10T PDOs after 72 hours of targeted treatment assessed by ATP luminescence assay.

**Supplementary Table 7. *VAF and mutated residues in matched-tissue, PDO and CAF.***
